# Supplementary material
Source: MDPI journal article supplement (https://www.mdpi.com/2077-0472/11/12/1271)
Supplement: s1 [file s1]

Archive with 2 entries (2 files):
- Supplementary material/Supplementary Figures S1-S9.pdf
- Supplementary material/Table S1.pdf
