# Supplementary material
Source: MDPI journal article supplement (https://www.mdpi.com/2077-0472/11/12/1271)
Supplement: s1 [file s1 › Supplementary material/Table S1.pdf]

**Table S1** Cases of *Diaporthe* species found alone or co-existing (+) with other species in the same plant material surveyed.

|    | Plantation        | Location         | Propagation Method | Species                                                                                                                                                                   |
|----|-------------------|------------------|--------------------|---------------------------------------------------------------------------------------------------------------------------------------------------------------------------|
| 1  | Soil plantation   | Arouca           | Micropropagation   | <i>D. malorum</i> <sup>a</sup><br><i>D. amygdali</i> + <i>D. crousii</i>                                                                                                  |
| 2  | Potted plantation | Ourém            | Micropropagation   | <i>D. ambigua</i> <sup>a</sup><br><i>Diaporthe</i> × <i>hybrida</i> + <i>D. rudis</i>                                                                                     |
| 3  | Soil plantation   | Alpiarça         | Stem cutting       | <i>D. rudis</i> <sup>a</sup>                                                                                                                                              |
| 4  | Soil plantation   | Penafiel         | Micropropagation   | <i>D. crousii</i> + <i>D. rudis</i> + <i>D. foeniculina</i>                                                                                                               |
| 5  | Soil plantation   | Póvoa de Lanhoso | Micropropagation   | <i>D. malorum</i> <sup>a</sup><br><i>D. rudis</i> <sup>a</sup>                                                                                                            |
| 6  | Soil plantation   | Urgezes          | Micropropagation   | <i>D. rudis</i> + <i>D. malorum</i> + <i>D. foeniculina</i><br><i>D. malorum</i> <sup>a</sup><br><i>D. rudis</i> <sup>a</sup>                                             |
| 7  | Soil plantation   | Agrela           | Micropropagation   | <i>D. rudis</i> + <i>D. foeniculina</i><br><i>D. rudis</i> + <i>D. leucospermi</i> + <i>D. malorum</i><br><i>D. rudis</i> <sup>a</sup><br><i>D. amygdali</i> <sup>a</sup> |
| 8  | Soil plantation   | Monte Córdova    | Micropropagation   | <i>D. malorum</i> <sup>a</sup><br><i>D. foeniculina</i> <sup>a</sup>                                                                                                      |
| 9  | Soil plantation   | Arcozelo         | Micropropagation   | <i>D. malorum</i> <sup>a</sup><br><i>D. foeniculina</i> <sup>a</sup><br><i>D. rudis</i> <sup>a</sup><br><i>D. rudis</i> + <i>D. malorum</i>                               |
| 10 | Soil plantation   | Idanha-a-Nova    | Micropropagation   | <i>D. rudis</i> <sup>a</sup>                                                                                                                                              |
| 11 | Soil plantation   | Águeda           | Micropropagation   | <i>D. rudis</i> <sup>a</sup><br><i>D. foeniculina</i> <sup>a</sup>                                                                                                        |
| 12 | Soil plantation   | Mangualde        | Micropropagation   | <i>D. rudis</i> <sup>a</sup><br><i>D. foeniculina</i> <sup>a</sup>                                                                                                        |

<sup>a</sup>Species found without co-occurrence of other members of *Diaporthe*
